# Supplementary figures and images for: The Landscape of Nucleotide Polymorphism among 13,500 Genes of the Conifer Picea glauca, Relationships with Functions, and Comparison with Medicago truncatula
Source: PubMed Central journal article supplement — Genome Biol Evol. 2013 Sep 23;5(10):1910–25. doi: 10.1093/gbe/evt143 (PMC3814201; doi:10.1093/gbe/evt143), 2013-09-23

**Fig. S1**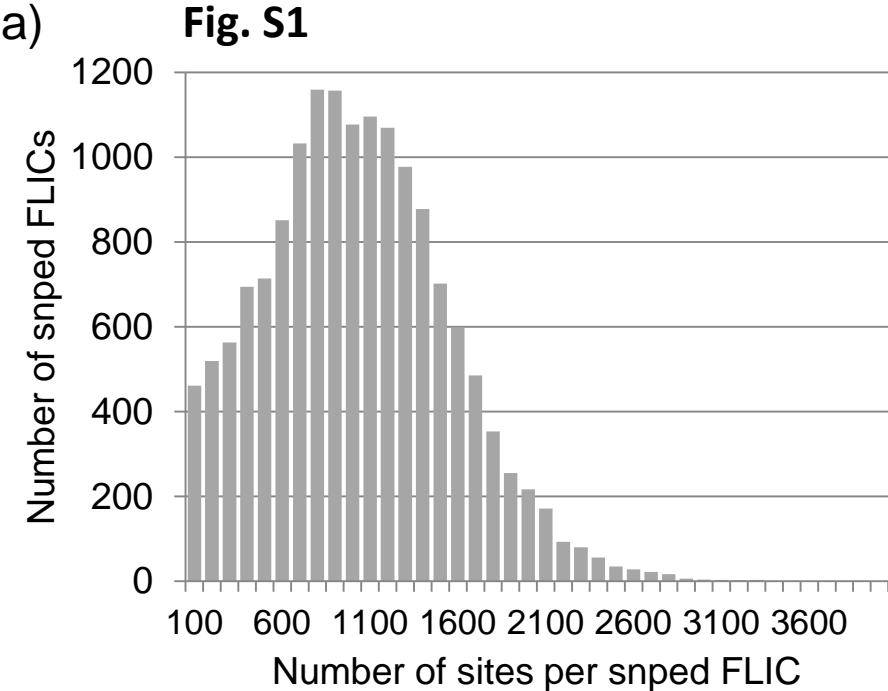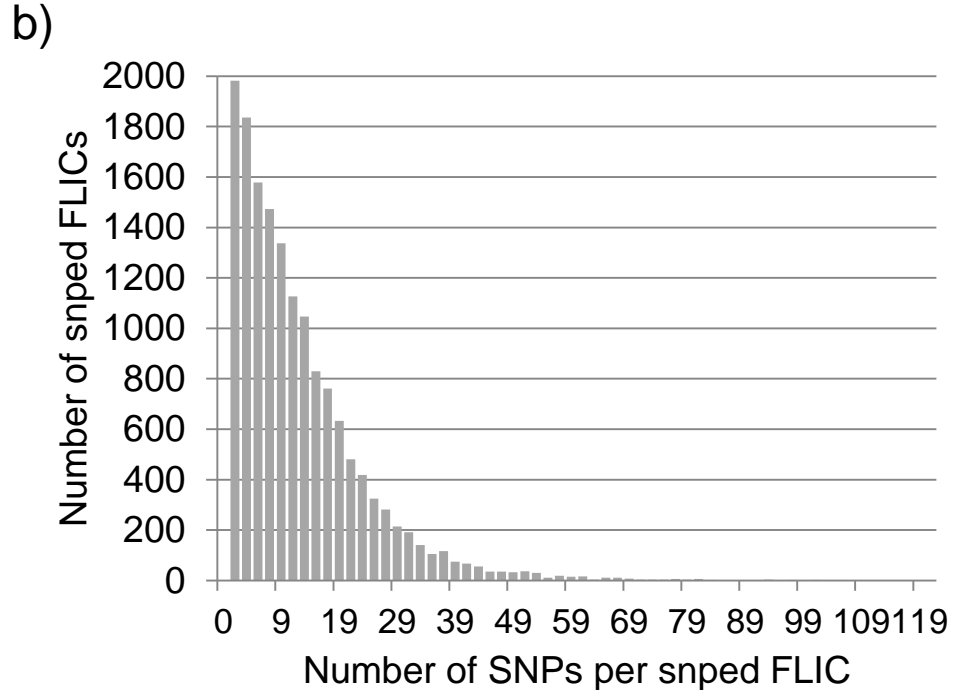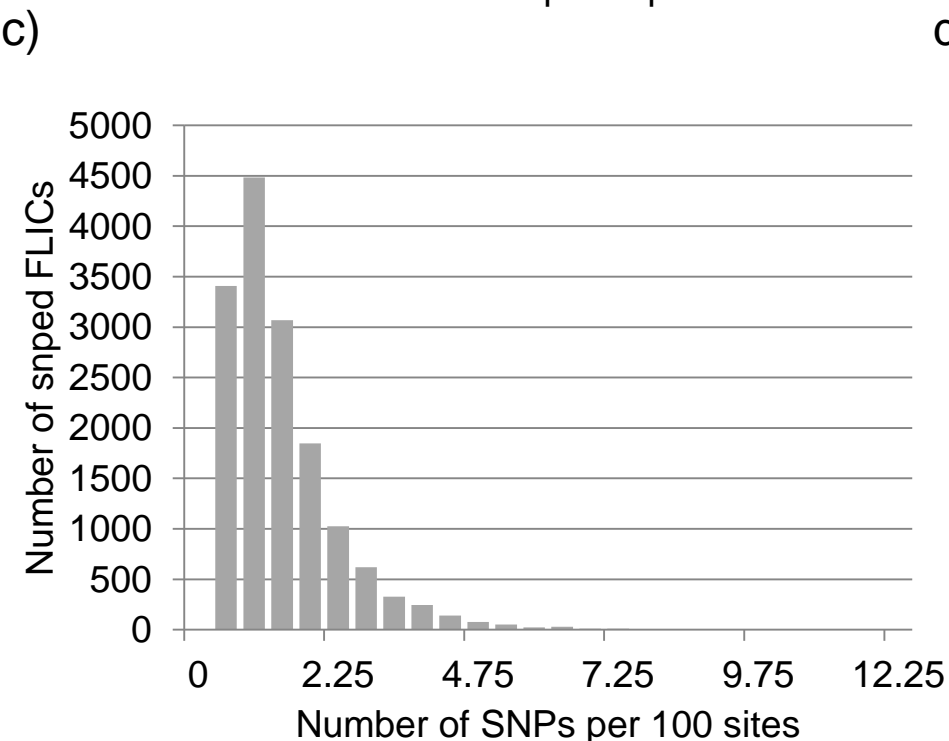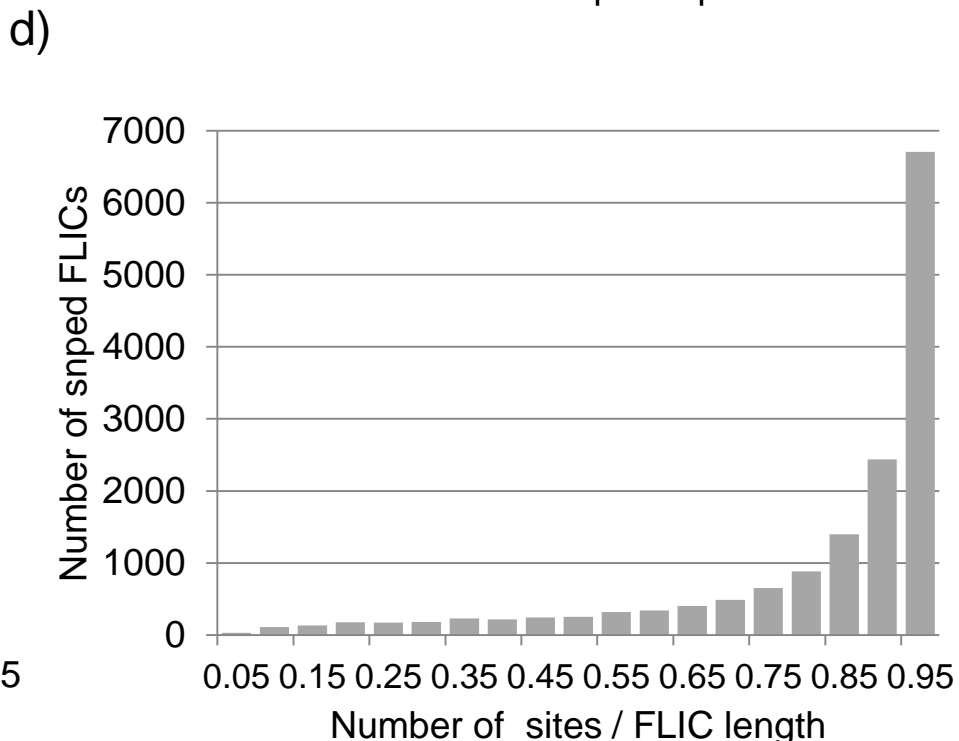

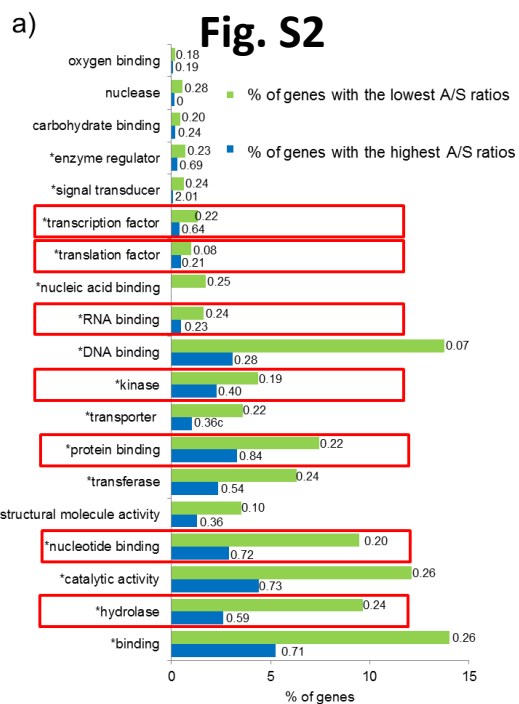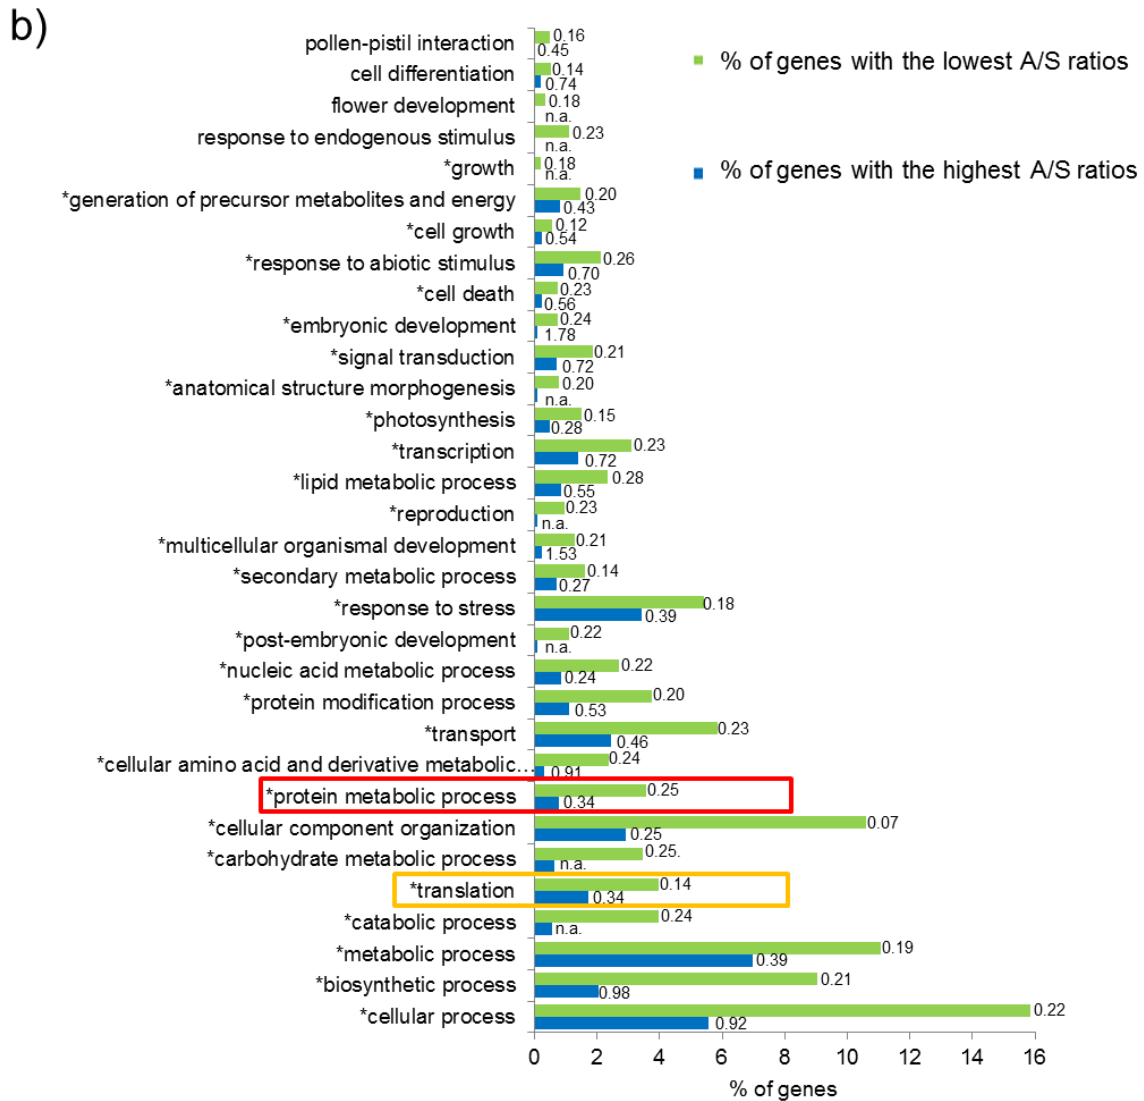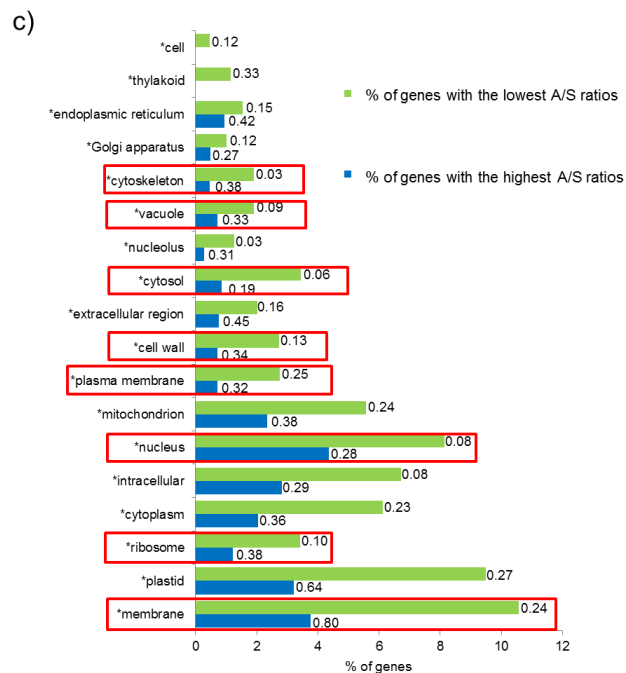

Supplement: supp_evt143_SupplementaryFigures.pdf [file supp_evt143_SupplementaryFigures.pdf]
